# Supplementary material for: Mitigating the charge trapping effects of D-sorbitol/poly(3,4-ethylenedioxythiophene):poly(styrenesulfonate) (PEDOT:PSS) polymer blend contacts to crystalline silicon
Source: publisher site journal article supplement (doi:10.1515/pac-2021-0606), 2021-08-20
Supplement: Supplementary file 1 [file j_pac-2021-0606_suppl.docx]

Mitigating the Charge Trapping Effects of D-Sorbitol / poly(3,4-ethylenedioxythiophene): poly(styrenesulfonate) (PEDOT:PSS) Polymer Blend Contacts to Crystalline Silicon

Daniel Cohen, Esha S. Thakur,and Michael G. Walter***

**Department of Chemistry, University of North Carolina at Charlotte, Charlotte, NC 28223-0001*

[*Michael.Walter@uncc.edu*](mailto:Michael.Walter@uncc.edu)

Supplemental Information:

Note: PEDOT:PSS/s-PEDOT:PSS silicon device fabrication and testing were similar to previous reports,1, 2 using the device configuration below (**Figure S1)**.


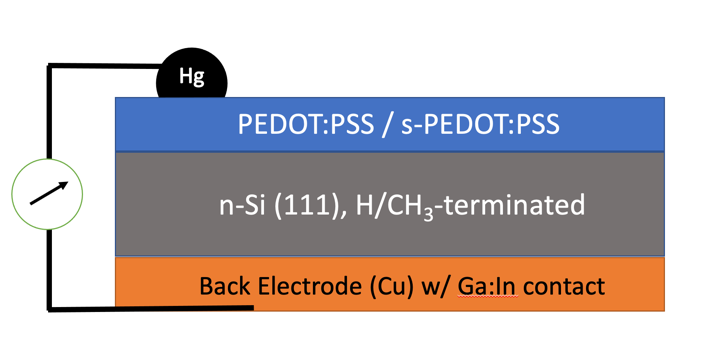


**Figure S1.** Device configuration used for measuring both dark and light current-voltage *JV* curve electrical properties of solution-processed PEDOT:PSS/s-PEDOT:PSS n-Si hybrid devices.


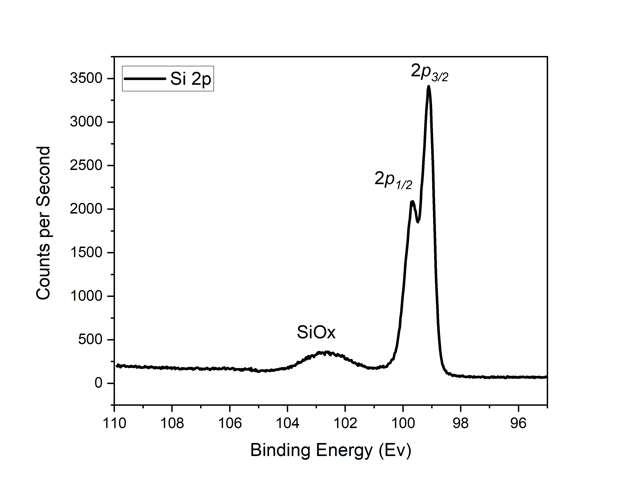

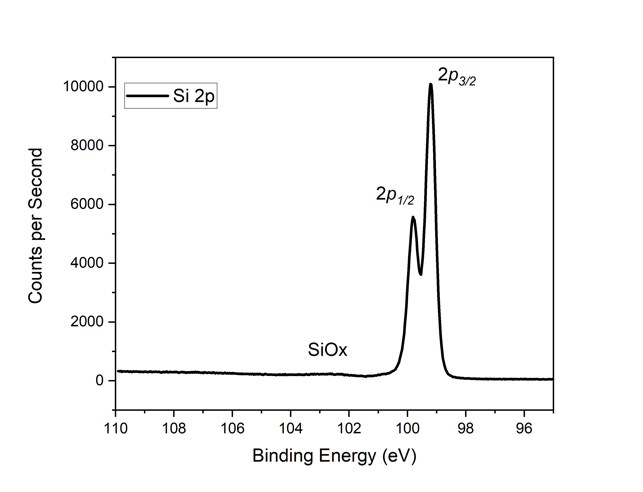


**b)**

**a)**

**Figure S2.** Silicon 2p XPS spectrum of H-Si(111)/PEDOT:PSS, (**a**) Me-Si(111)/PEDOT:PSS (**b**) after removal of the organic layer and surface cleaning.

1. Walter, M. G.; Liu, X.; O'Leary, L. E.; Brunschwig, B. S.; Lewis, N. S., Electrical Junction Behavior of Poly(3,4-ethylenedioxythiophene) (PEDOT) Contacts to H-Terminated and CH3-Terminated p-, n-, and n+-Si(111) Surfaces. *J. Phys. Chem. C* **2013,** *117* (28), 14485-14492.

2. Cohen, D.; Bostian, M. E.; Nguyen, L.; Walter, M. G., Conductive poly(3,4-ethylenedioxythiophene): poly(styrene sulfonate) polymer glue as an ohmic and rectifying electrical contact for H-terminated n-Si and p-Si wafers. *Polym Int* **2018,** *67* (7), 853-858.
